# Supplementary material for: Effect of normal stress on the frictional behavior of brucite: application to slow earthquakes at the subduction plate interface in the mantle wedge
Source: Copernicus journal article supplement (doi:10.5194/se-12-171-2021), 2021-01-25
Supplement: Supplementary file 1 [file se-12-171-2021-supplement.zip]

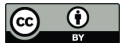

## *Supplement of*

# **Effect of normal stress on the frictional behavior of brucite: application to slow earthquakes at the subduction plate interface in the mantle wedge**

**Hanaya Okuda et al.**

*Correspondence to:* Hanaya Okuda ([okuda@aori.u-tokyo.ac.jp](mailto:okuda@aori.u-tokyo.ac.jp))

- [se-12-171-2021-supplement-title-page.pdf](#)
- [SI\\_v20201130.docx](#)
- [TableS1\\_revised.csv](#)

The copyright of individual parts of the supplement might differ from the CC BY 4.0 License.
