# Supplementary material for: Effect of normal stress on the frictional behavior of brucite: application to slow earthquakes at the subduction plate interface in the mantle wedge
Source: Copernicus journal article supplement (doi:10.5194/se-12-171-2021), 2021-01-25
Supplement: Supplementary file 1 [file SI_v20201130.docx]

Supporting information for:

Effect of normal stress on the frictional behavior of brucite: Application to slow earthquakes at the subduction plate interface in the mantle wedge

Hanaya Okuda1,2, Ikuo Katayama3, Hiroshi Sakuma4, Kenji Kawai1

1Department of Earth and Planetary Science, School of Science, University of Tokyo, Bunkyo, 113-0033 Tokyo, Japan

2Department of Ocean Floor Geoscience, Atmosphere and Ocean Research Institute, University of Tokyo, Kashiwa, 277-8564 Chiba, Japan

3Department of Earth and Planetary Systems Science, School of Science, Hiroshima University, Higashi-Hiroshima, 739-8526 Hiroshima, Japan

4Research Center for Functional Materials, National Institute for Materials Science, Tsukuba, 305-0044 Ibaraki, Japan

*Correspondence to:* Hanaya Okuda (okuda@aori.u-tokyo.ac.jp)

This supporting information includes one figure (Figure S1). For the data set (Table S1), see attached TableS1.csv file.


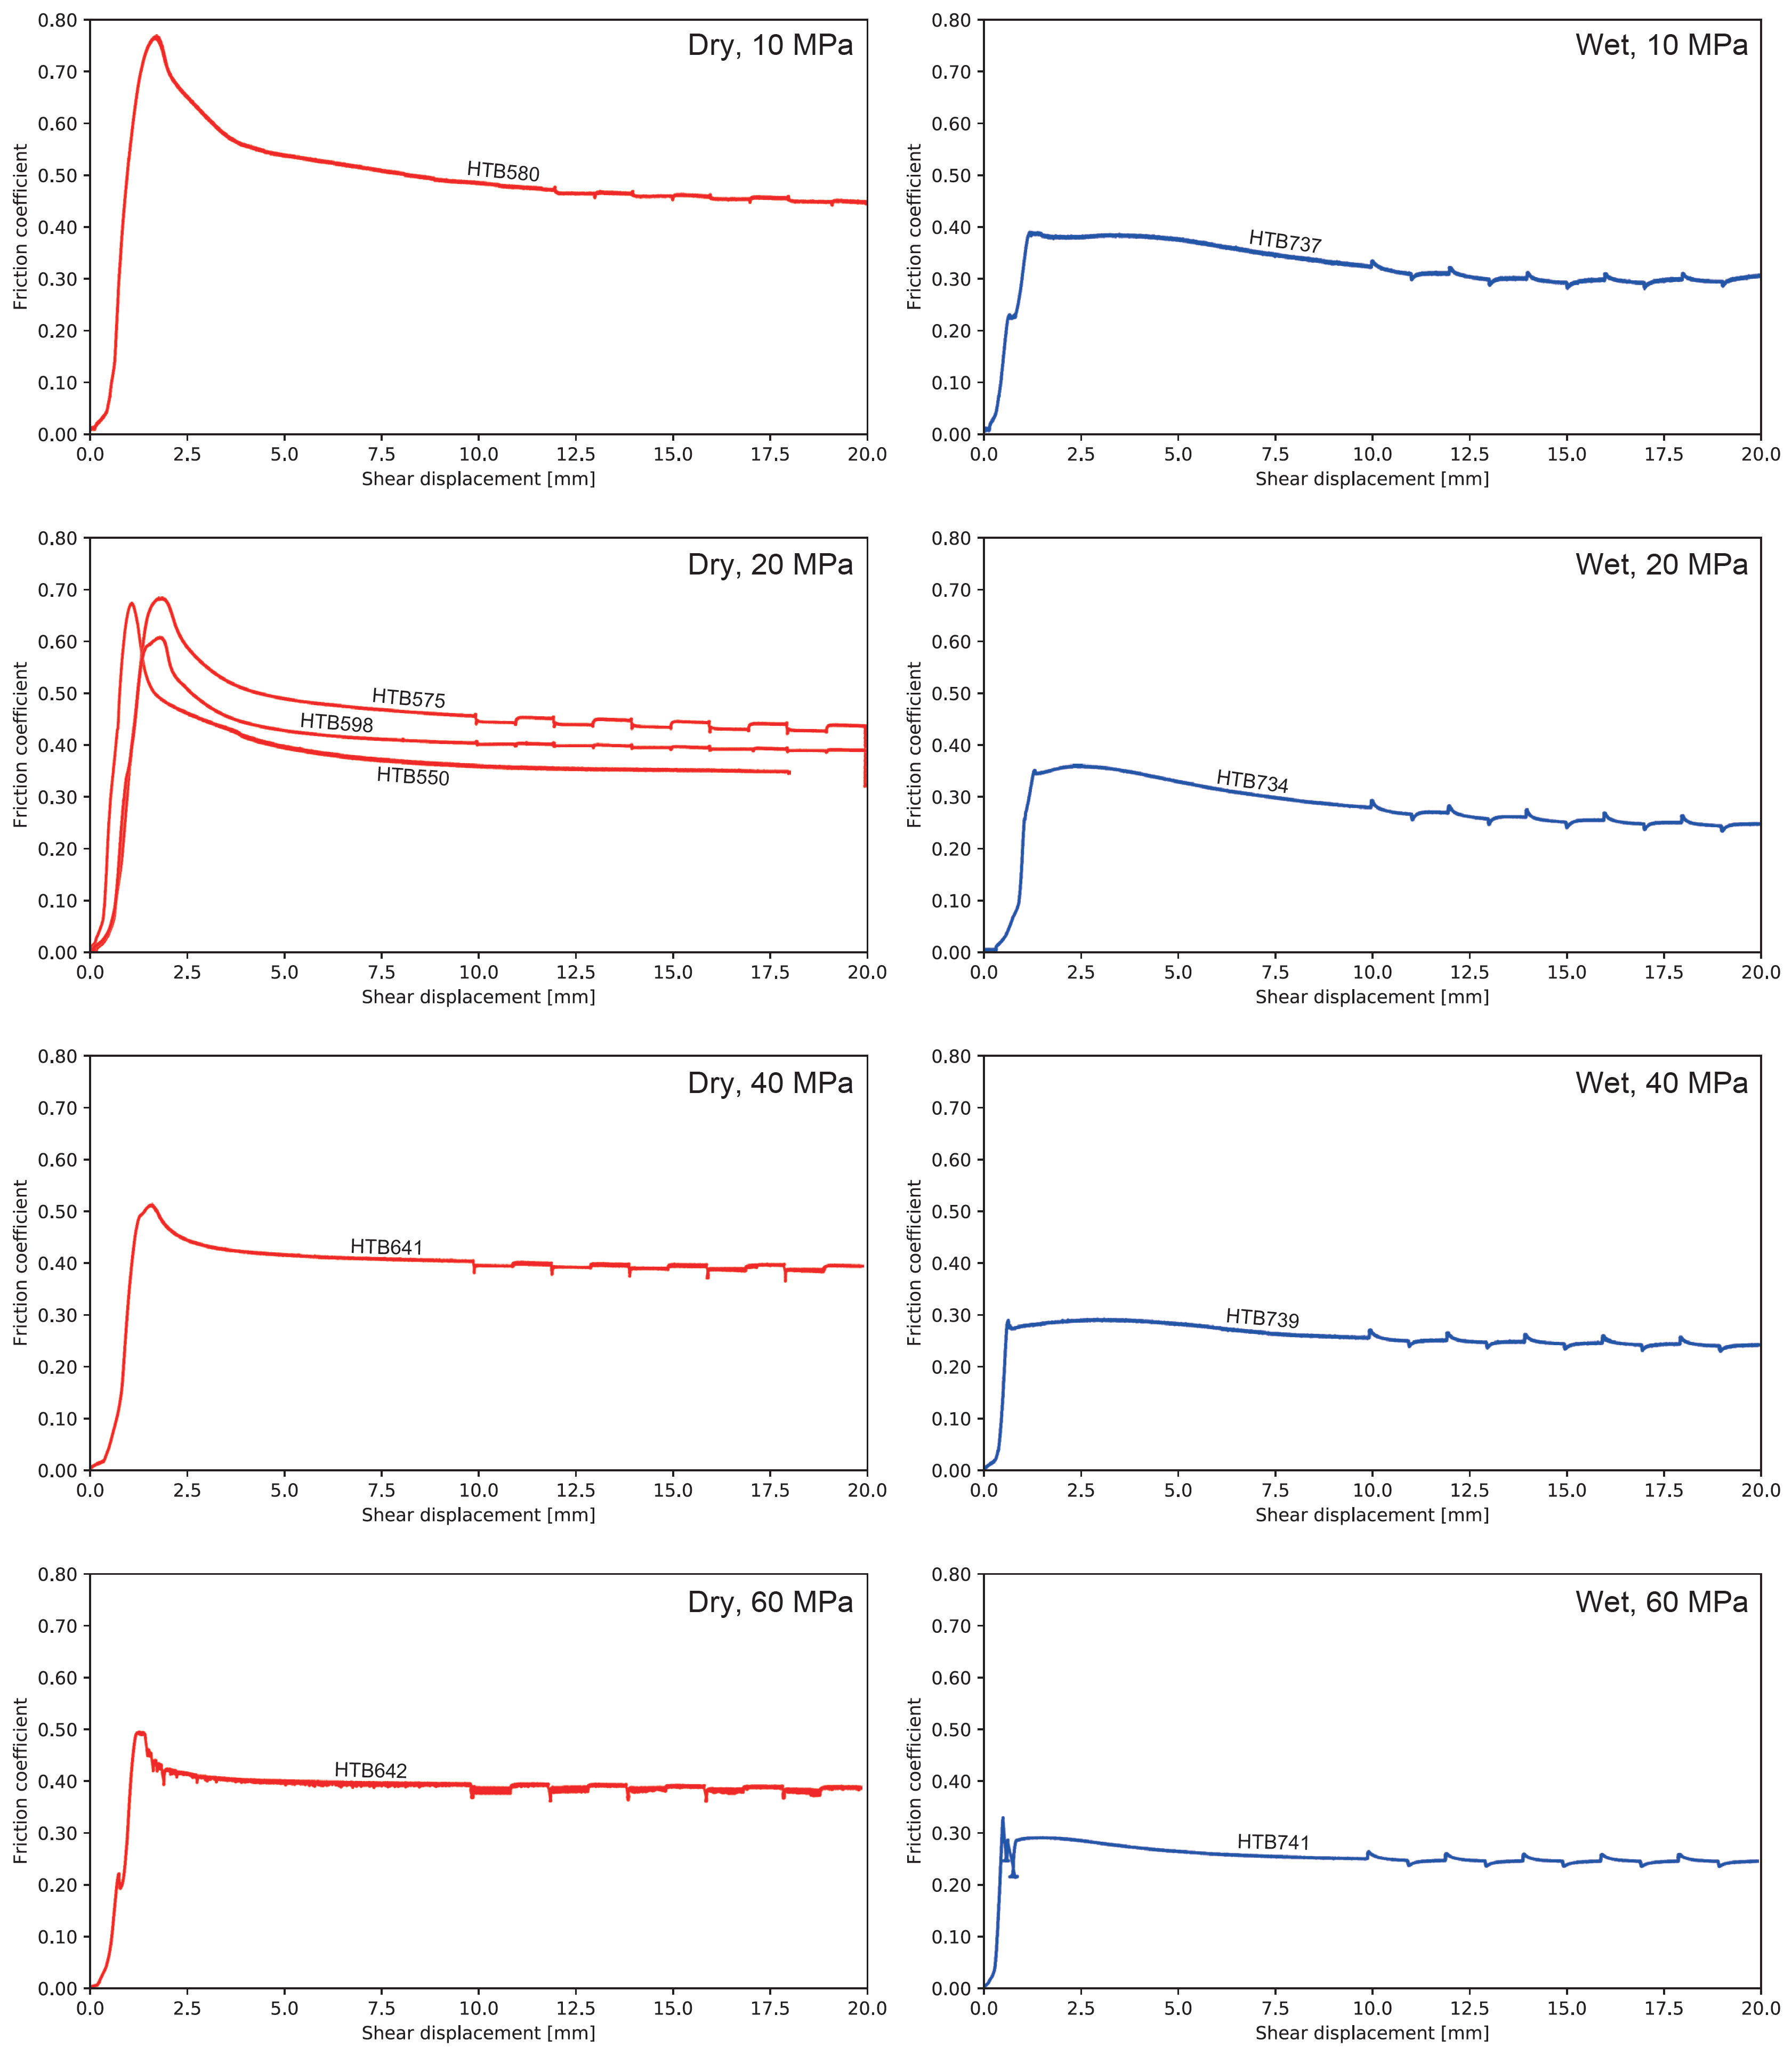


Figure S1. Experimental data for every normal stress.
