# Supplementary material for: Effect of normal stress on the frictional behavior of brucite: application to slow earthquakes at the subduction plate interface in the mantle wedge
Source: Copernicus journal article supplement (doi:10.5194/se-12-171-2021), 2021-01-25
Supplement: Supplementary file 2 [file se-12-171-2021-supplement.zip]

Archive with 3 entries (3 files):
- SI_v20201130.docx
- se-12-171-2021-supplement-title-page.pdf
- TableS1_revised.csv
