# Supplementary material for: Effect of normal stress on the frictional behavior of brucite: application to slow earthquakes at the subduction plate interface in the mantle wedge
Source: Copernicus journal article supplement (doi:10.5194/se-12-171-2021), 2021-01-25
Supplement: Supplementary file 2 [file se-12-171-2021-supplement.zip › TableS1_revised.csv]

										Aging law	upstep											Aging law	downstep
Experiment	Date	condition	Humidity [%]	Normal stress [MPa]	Load point velocity [microns/sec]	Final shear displacement [mm]	mu_peak	mu_ss_10mm	mu_ss_20mm	a-b	a-b_err	a	a_err	b1	b1_err	b2	b2_err	dc1	dc1_err	dc2	dc2_err	a-b	a-b_err	a	a_err	b1	b1_err	b2	b2_err	dc1	dc1_err	dc2	dc2_err
HTB550	2017 Sep	dry	56	20	3	18	0.6729	0.3598	0.34989	n/a	n/a	n/a	n/a	n/a	n/a	n/a	n/a	n/a	n/a	n/a	n/a	n/a	n/a	n/a	n/a	n/a	n/a	n/a	n/a	n/a	n/a	n/a	n/a
HTB575	2017 Dec	dry	20	20	3-33	20	0.68307	0.45629	0.43702	-0.004675094	0.000280075	0.002211192	0.000165014	0.006074024	0.000204681	0.000812262	9.65E-05	6.750399671	0.285215023	72.35449361	13.25390958	-0.004824125	0.000240308	0.001076666	0.000170325	0.005900791	0.000169521	n/a	n/a	59.84213611	3.471070352	n/a	n/a
HTB580	2017 Dec	dry	15	10	3-33	20	0.76733	0.48541	0.44862	-0.002408848	0.00040453	0.001019778	0.00028574	0.003428626	0.000286351	n/a	n/a	17.68149894	2.68596771	n/a	n/a	-0.001360402	0.000286028	0.002475242	0.00020302	0.003835645	0.000201482	n/a	n/a	56.35978502	4.996758848	n/a	n/a
ND1	2018 Mar	dry	31.8	20	n/a	0	n/a	n/a	n/a	n/a	n/a	n/a	n/a	n/a	n/a	n/a	n/a	n/a	n/a	n/a	n/a	n/a	n/a	n/a	n/a	n/a	n/a	n/a	n/a	n/a	n/a	n/a	n/a
HTB593	2018 Mar	dry	26.2	20	3	1.5	n/a	n/a	n/a	n/a	n/a	n/a	n/a	n/a	n/a	n/a	n/a	n/a	n/a	n/a	n/a	n/a	n/a	n/a	n/a	n/a	n/a	n/a	n/a	n/a	n/a	n/a	n/a
HTB595	2018 Mar	dry	24.5	20	3	2.5	0.59955	n/a	n/a	n/a	n/a	n/a	n/a	n/a	n/a	n/a	n/a	n/a	n/a	n/a	n/a	n/a	n/a	n/a	n/a	n/a	n/a	n/a	n/a	n/a	n/a	n/a	n/a
HTB598	2018 Mar	dry	25	20	3-33	20	0.60747	0.40406	0.39023	-0.000969652	0.000232579	0.001502231	0.000159876	0.002744039	0.000164188	-0.000272156	3.97E-05	5.558184902	0.306934813	166.3672936	60.04187631	-0.000869817	0.000163155	0.001398408	0.000115665	0.002268224	0.00011507	n/a	n/a	43.36151521	3.397351648	n/a	n/a
HTB601	2018 Mar	dry	15	20	3	10	0.64788	0.41481	n/a	n/a	n/a	n/a	n/a	n/a	n/a	n/a	n/a	n/a	n/a	n/a	n/a	n/a	n/a	n/a	n/a	n/a	n/a	n/a	n/a	n/a	n/a	n/a	n/a
HTB641	2018 Dec	dry	17.7	40	3-33	20	0.51241	0.40441	0.3948	-0.003093252	0.000343956	n/a	n/a	n/a	n/a	n/a	n/a	n/a	n/a	n/a	n/a	-0.001948198	0.000439317	n/a	n/a	n/a	n/a	n/a	n/a	n/a	n/a	n/a	n/a
HTB642	2018 Dec	dry	18.5	60	3-33	20	0.49435	0.39455	0.38801	-0.00335768	0.000753567	n/a	n/a	n/a	n/a	n/a	n/a	n/a	n/a	n/a	n/a	-0.001158316	0.000638573	n/a	n/a	n/a	n/a	n/a	n/a	n/a	n/a	n/a	n/a
HTB734	2019 Dec	wet	n/a	20	3-33	20	0.35202	0.28008	0.24834	-0.001116481	0.000190159	0.005301335	0.000134332	0.006417816	0.000134594	n/a	n/a	73.2270175	2.161412479	n/a	n/a	-0.001812265	0.00011223	0.005796099	8.17E-05	0.007608364	7.70E-05	n/a	n/a	189.7327215	4.34942431	n/a	n/a
HTB735	2019 Dec	wet	n/a	20	3	10	0.36647	0.28726	n/a	n/a	n/a	n/a	n/a	n/a	n/a	n/a	n/a	n/a	n/a	n/a	n/a	n/a	n/a	n/a	n/a	n/a	n/a	n/a	n/a	n/a	n/a	n/a	n/a
HTB736	2019 Dec	wet	n/a	20	3	1.2	n/a	n/a	n/a	n/a	n/a	n/a	n/a	n/a	n/a	n/a	n/a	n/a	n/a	n/a	n/a	n/a	n/a	n/a	n/a	n/a	n/a	n/a	n/a	n/a	n/a	n/a	n/a
HTB737	2019 Dec	wet	n/a	10	3-33	20	0.38927	0.32364	0.3064	-0.000974338	0.00025888	0.00395321	0.000182967	0.004927548	0.000183144	n/a	n/a	83.40943757	4.571791837	n/a	n/a	-0.001139954	0.000163077	0.00473651	0.00011968	0.005876464	0.000110773	n/a	n/a	215.5260289	9.600060514	n/a	n/a
HTB738	2019 Dec	wet	n/a	20	3	1.8	0.34459	n/a	n/a	n/a	n/a	n/a	n/a	n/a	n/a	n/a	n/a	n/a	n/a	n/a	n/a	n/a	n/a	n/a	n/a	n/a	n/a	n/a	n/a	n/a	n/a	n/a	n/a
HTB739	2020 Dec	wet	n/a	40	3	20	0.289	0.256	0.24266	0.000100907	0.000164332	0.005583073	0.00011624	0.005482166	0.00011616	n/a	n/a	80.11147188	2.498298057	n/a	n/a	-8.15E-05	9.97E-05	0.005298503	7.32E-05	0.005380023	6.77E-05	n/a	n/a	204.1424148	6.000307897	n/a	n/a
HTB741	2020 Dec	wet	n/a	60	3-33	20	0.329	0.2505	0.2455	0.001203405	0.000110444	0.005398652	7.83E-05	0.004195247	7.79E-05	n/a	n/a	85.24418953	2.374301542	n/a	n/a	0.001089718	7.99E-05	0.005102572	5.95E-05	0.004012854	5.33E-05	n/a	n/a	228.1857755	7.588767565	n/a	n/a
